# Supplementary material
Source: Springer Nature journal article supplement (https://www.springermedizin.de/resource/supplementary/12936_2004_94_MOESM1_ESM.pdf/9546856)
Supplement: MOESM1 [file 9546856]

5'HuV<sub>H</sub>A

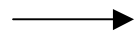

3'HuV<sub>H</sub>-Link

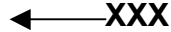

5'HuV<sub>λ</sub>

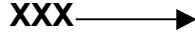

3'Hu<sub>λ</sub>

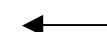

V<sub>H</sub>

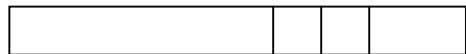

V

D

J

C

λ

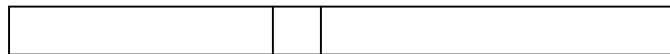

V

J

C

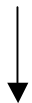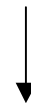

PCR from  
PBL cDNA

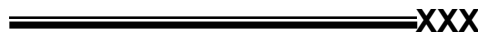

V<sub>H</sub>

XXX

XXX

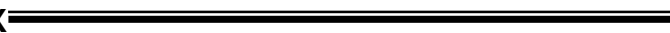

λ

Mix amplified  
heavy and light  
chain genes

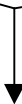

5'HuV<sub>H</sub>B

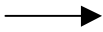

3'Hu<sub>λ</sub>

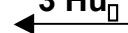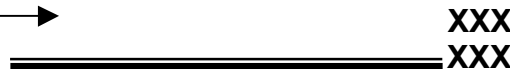

V<sub>H</sub>

XXX

XXX

λ

Anneal and combine  
heavy and light  
chain genes by PCR with  
flanking primers.

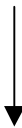

*Nhe*I

*Hind*III

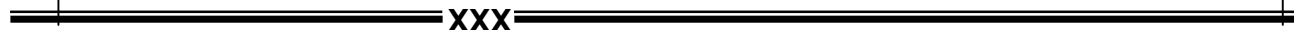

XXX

V<sub>H</sub>/λ
